# Supplementary material for: Do Solid Waste Landfills Really Affect Land Use Change? Answers Using the Weighted Environmental Index (WEI)
Source: MDPI journal article supplement (doi:10.3390/rs14215502), 2022-11-01

**Table S1.** Basic values of the evaluation factors ( $F_i$ ) for every land use considered by the SIOSE and final value of the Weighted Environmental Index for a single-use polygon ( $WEI_k$ )

| Code | Land use description                  | $F_1$ | $F_2$ | $F_3$ | $F_4$ | $F_5$ | $WEI_k$ |
|------|---------------------------------------|-------|-------|-------|-------|-------|---------|
| EDF  | Buildings                             | 20    | 40    | 20    | 15    | 5     | 20      |
| ZAU  | Artificial green zone and Urban trees | 60    | 65    | 70    | 80    | 75    | 70      |
| LAA  | Artificial water body                 | 65    | 85    | 85    | 65    | 50    | 70      |
| VAP  | Road, Parking or Pedestrian area      | 20    | 40    | 20    | 15    | 5     | 20      |
| OCT  | Other constructions                   | 20    | 40    | 20    | 15    | 5     | 20      |
| SNE  | Soil without edifications             | 35    | 50    | 50    | 50    | 15    | 40      |
| ZEV  | Extraction zones                      | 0     | 50    | 0     | 0     | 0     | 10      |
| CHA  | Rice crops                            | 60    | 10    | 80    | 45    | 55    | 50      |
| CHL  | Other crops different from rice       | 60    | 65    | 80    | 75    | 70    | 70      |
| LFC  | Citrics                               | 60    | 65    | 80    | 75    | 70    | 70      |
| LFN  | Non citrics                           | 60    | 65    | 80    | 75    | 70    | 70      |
| LVI  | Vineyard                              | 60    | 65    | 80    | 75    | 70    | 70      |
| LOL  | Olives                                | 60    | 65    | 80    | 75    | 70    | 70      |
| LOC  | Other woody crops                     | 60    | 65    | 80    | 75    | 70    | 70      |
| PRD  | Meadows                               | 80    | 80    | 90    | 100   | 100   | 90      |
| PST  | Pastureland                           | 80    | 80    | 80    | 80    | 80    | 80      |
| FDC  | Hardwood deciduous                    | 100   | 100   | 100   | 100   | 100   | 100     |
| FDP  | Evergreen hardwoods                   | 100   | 100   | 100   | 100   | 100   | 100     |
| CNF  | Conifers                              | 100   | 100   | 100   | 100   | 100   | 100     |
| MTR  | Scrub                                 | 70    | 70    | 70    | 70    | 70    | 70      |
| PDA  | Sandy beaches                         | 100   | 100   | 50    | 100   | 100   | 90      |
| SDN  | Bare soil                             | 70    | 50    | 20    | 20    | 40    | 40      |
| ZQM  | Burned areas                          | 0     | 50    | 0     | 0     | 0     | 10      |
| RMB  | Ravines                               | 20    | 50    | 20    | 50    | 60    | 40      |
| ACM  | Marine cliffs                         | 100   | 50    | 50    | 100   | 100   | 80      |
| ARR  | Rocky soil                            | 80    | 50    | 30    | 30    | 60    | 50      |
| CCH  | Stone quarry                          | 80    | 50    | 40    | 40    | 40    | 50      |
| CLC  | Lava flow                             | 90    | 30    | 30    | 40    | 60    | 50      |
| HPA  | Marshes                               | 80    | 50    | 30    | 80    | 60    | 60      |
| HSA  | Continental salines                   | 90    | 30    | 40    | 80    | 60    | 60      |
| HMA  | Marshes                               | 90    | 60    | 70    | 90    | 90    | 80      |
| HSM  | Marine salines                        | 90    | 60    | 70    | 90    | 90    | 80      |
| ACU  | Water flows                           | 100   | 100   | 100   | 100   | 100   | 100     |
| ALG  | Lakes and lagoons                     | 100   | 100   | 100   | 100   | 100   | 100     |
| AEM  | Dams and artificial lakes             | 10    | 100   | 100   | 100   | 90    | 80      |
| ALC  | Coastal lagoons                       | 100   | 100   | 100   | 100   | 100   | 100     |
| AMO  | Seas and Oceans                       | 100   | 100   | 100   | 100   | 100   | 100     |
|      | Non predefined                        | 50    | 50    | 50    | 50    | 50    | 50      |
| OVD  | Olives and Vineyard                   | 60    | 65    | 80    | 75    | 70    | 70      |
| AAR  | Residential agricultural settlement   | 40    | 50    | 60    | 50    | 50    | 50      |
| UER  | Family orchard                        | 60    | 65    | 75    | 70    | 80    | 70      |
| UCS  | Urban center                          | 30    | 30    | 10    | 20    | 10    | 20      |
| UEN  | Urban expansion area                  | 30    | 30    | 10    | 20    | 10    | 20      |
| UDS  | Discontinuous                         | 30    | 30    | 10    | 20    | 10    | 20      |
| IPO  | Well sorted industrial area           | 30    | 30    | 10    | 20    | 10    | 20      |
| IPS  | Non sorted industrial area            | 30    | 30    | 10    | 20    | 10    | 20      |
| IAS  | Isolated industrial area              | 30    | 30    | 10    | 20    | 10    | 20      |
| PAG  | Agricultural, livestock               | 60    | 60    | 70    | 50    | 60    | 60      |
| PFT  | Primary forest                        | 100   | 100   | 100   | 100   | 100   | 100     |
| PMX  | Extractive Mining                     | 10    | 10    | 10    | 10    | 10    | 10      |
| PPS  | Fish farm                             | 30    | 60    | 60    | 50    | 50    | 50      |
| TCO  | Commercial and offices                | 20    | 20    | 20    | 20    | 20    | 20      |
| TCH  | Hotels                                | 20    | 20    | 20    | 20    | 20    | 20      |
| TPR  | Recreational park                     | 20    | 20    | 20    | 20    | 20    | 20      |
| TCG  | Camping                               | 20    | 40    | 40    | 50    | 50    | 40      |

|     |                                |     |     |     |     |     |     |
|-----|--------------------------------|-----|-----|-----|-----|-----|-----|
| EAI | Institutional administrative   | 20  | 20  | 20  | 20  | 20  | 20  |
| ESN | Medical and sanitary           | 20  | 20  | 20  | 20  | 20  | 20  |
| ECM | Cementery                      | 20  | 20  | 20  | 20  | 20  | 20  |
| EDU | Education                      | 20  | 20  | 20  | 20  | 20  | 20  |
| EPN | Penitentiary                   | 20  | 20  | 20  | 20  | 20  | 20  |
| ERG | Religious                      | 20  | 20  | 20  | 20  | 20  | 20  |
| ECL | Cultural                       | 20  | 20  | 20  | 20  | 20  | 20  |
| EDP | Sport                          | 25  | 15  | 20  | 20  | 20  | 20  |
| ECG | Golf course                    | 40  | 10  | 70  | 50  | 80  | 50  |
| EPU | Urban park                     | 60  | 65  | 70  | 80  | 75  | 70  |
| NRV | Streets and roads              | 10  | 10  | 10  | 10  | 10  | 10  |
| NRF | Train                          | 10  | 10  | 10  | 10  | 10  | 10  |
| NPO | Port                           | 10  | 10  | 10  | 10  | 10  | 10  |
| NAP | Airport                        | 10  | 10  | 10  | 10  | 10  | 10  |
| NEO | Eolic plant                    | 10  | 10  | 10  | 100 | 20  | 30  |
| NSL | Solar plant                    | 10  | 10  | 10  | 100 | 20  | 30  |
| NCL | Nuclear plant                  | 0   | 0   | 0   | 0   | 0   | 0   |
| NEL | Electric plant                 | 0   | 0   | 0   | 0   | 0   | 0   |
| NTM | Thermal plant                  | 0   | 0   | 0   | 0   | 0   | 0   |
| NHD | Hydroelectric plant            | 10  | 10  | 10  | 10  | 10  | 10  |
| NTC | Telecommunications plant       | 0   | 0   | 0   | 0   | 0   | 0   |
| NDP | Waste and drinking water plant | 10  | 20  | 10  | 100 | 10  | 30  |
| NCC | Channels                       | 0   | 0   | 0   | 0   | 0   | 0   |
| NDS | Desalinization plant           | 0   | 0   | 0   | 0   | 0   | 0   |
| NVE | Landfills                      | 0   | 0   | 0   | 0   | 0   | 0   |
| NPT | Treatment plant                | 0   | 0   | 0   | 0   | 0   | 0   |
| UEN | Urban expansion area           | 30  | 30  | 10  | 20  | 10  | 20  |
| UDS | Discontinuous                  | 30  | 30  | 10  | 20  | 10  | 20  |
| IPO | Well sorted industrial area    | 30  | 30  | 10  | 20  | 10  | 20  |
| IPS | Non sorted industrial area     | 30  | 30  | 10  | 20  | 10  | 20  |
| IAS | Isolated industrial area       | 30  | 30  | 10  | 20  | 10  | 20  |
| PAG | Agricultural, livestock        | 60  | 60  | 70  | 50  | 60  | 60  |
| PFT | Primary forest                 | 100 | 100 | 100 | 100 | 100 | 100 |
| PMX | Extractive mining              | 10  | 10  | 10  | 10  | 10  | 10  |

**Figure S1. LCM and WEI Evolution over time for every landfill**

**Algimia de Alfara landfill LCM**

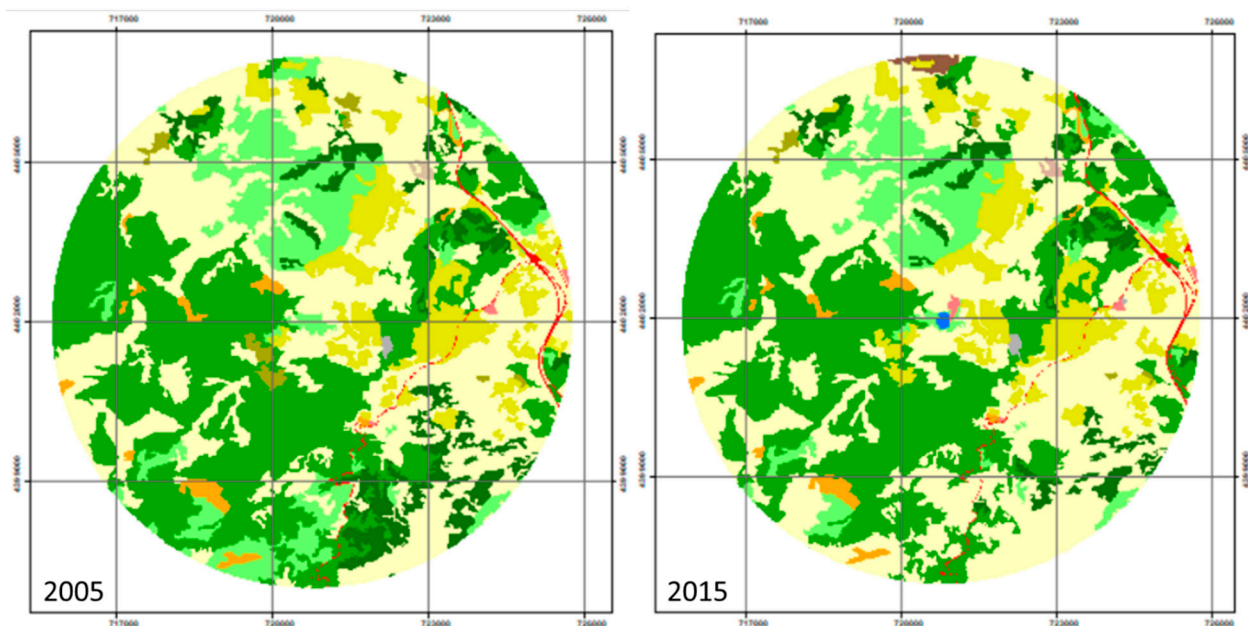

| Categories                     | 2005    | 2015    | 2005   | 2015  | Diferences %<br>2015-2005 |
|--------------------------------|---------|---------|--------|-------|---------------------------|
|                                | Has     |         | % Area |       |                           |
| Isolated industrial area       | 7,39    | 14,20   | 0,09   | 0,18  | 0,09                      |
| Railways                       | 5,52    | 5,52    | 0,07   | 0,07  | 0,00                      |
| Road Networks                  | 41,72   | 41,72   | 0,53   | 0,53  | 0,00                      |
| Urban discontinuous            |         | 1,17    |        | 0,01  | 0,01                      |
| Irrigated herbaceous crops     | 4,71    |         | 0,06   |       | -0,06                     |
| Non-Irrigated herbaceous crops | 0,96    | 0,96    | 0,01   | 0,01  | 0,00                      |
| Citric fruit trees             | 589,84  | 591,68  | 7,51   | 7,53  | 0,02                      |
| Non-Citric fruit trees         | 44,57   | 75,73   | 0,57   | 0,96  | 0,40                      |
| Non predefined mosaic          | 2977,93 | 3370,53 | 37,92  | 42,92 | 5,00                      |
| Olives                         | 65,05   | 23,13   | 0,83   | 0,29  | -0,53                     |
| Pastures                       | 879,21  | 674,11  | 11,19  | 8,58  | -2,61                     |
| Conifers                       | 518,83  | 321,15  | 6,61   | 4,09  | -2,52                     |
| Primary Forest                 | 2609,07 | 2590,55 | 33,22  | 32,98 | -0,24                     |
| Scrub                          | 91,92   | 91,92   | 1,17   | 1,17  | 0,00                      |
| Soil without vegetation        | 10,32   | 10,32   | 0,13   | 0,13  | 0,00                      |
| Extraction or discharge zones  | 6,75    | 1,06    | 0,09   | 0,01  | -0,07                     |
| Artificial water surface       |         | 5,87    |        | 0,07  | 0,07                      |
| Mining zones                   |         | 8,52    |        | 0,11  | 0,11                      |
| Burned areas                   |         | 25,63   |        | 0,33  | 0,33                      |
| TOTAL                          | 7853,77 |         |        |       |                           |

2.52% of conifers and 2.6% of grassland areas have been lost. Crops have increased by 6% with respect to the total study area

Algimia de Alfara landfill WEI evolution

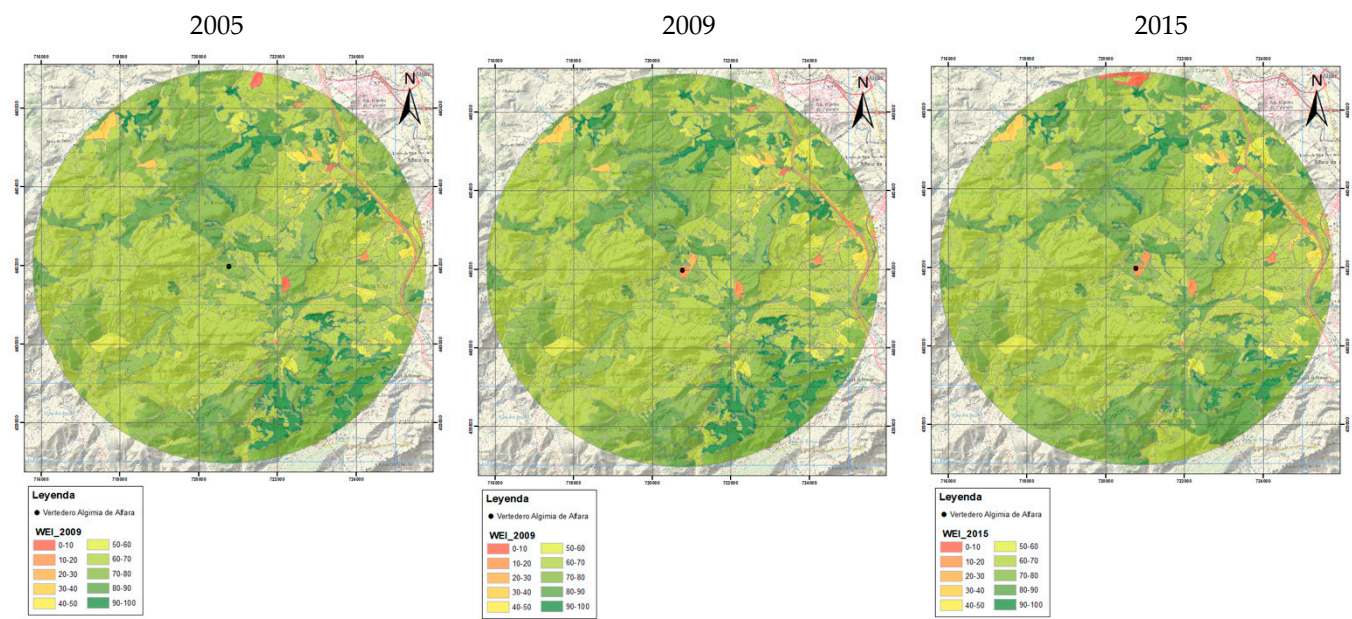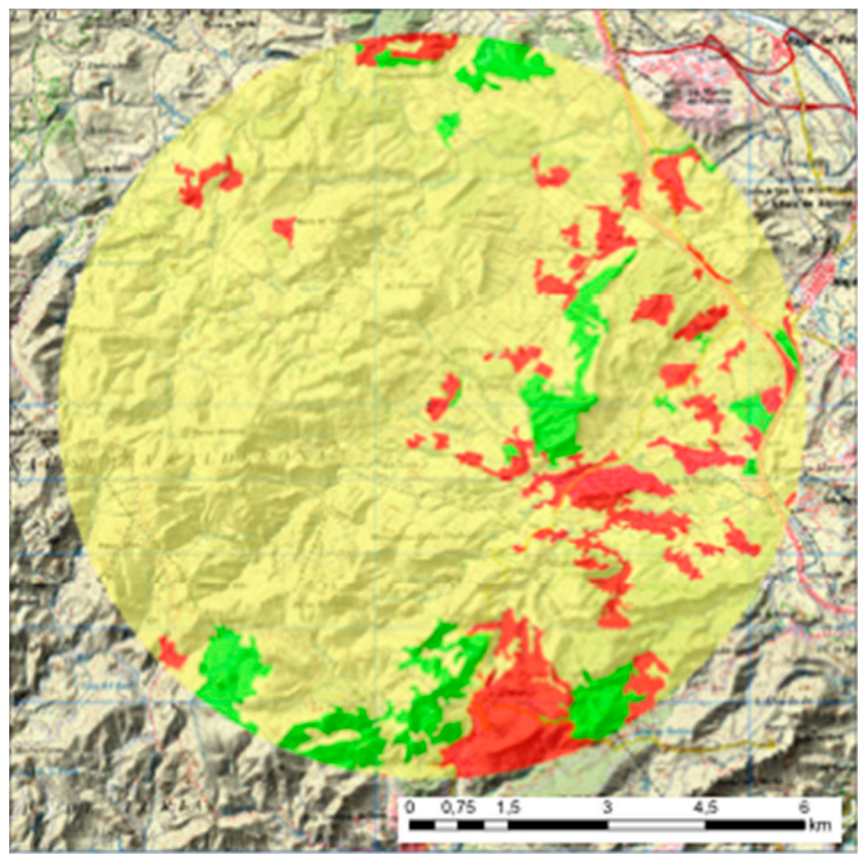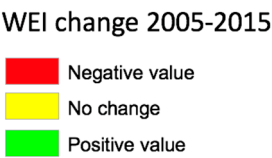



## Campello landfill LCM

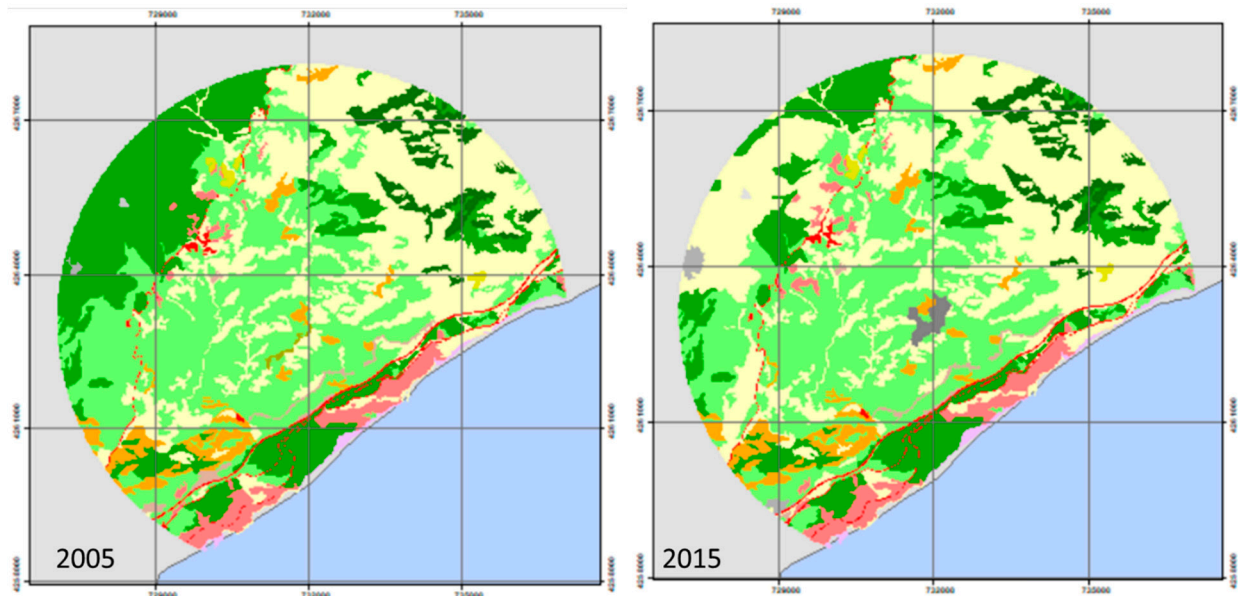

| Category                       | 2005    | 2015    | 2005   | 2015  | Diferences %<br>2015-2005 |
|--------------------------------|---------|---------|--------|-------|---------------------------|
|                                | Has     |         | % Area |       |                           |
| Isolated industrial area       | 1,59    | 1,03    | 0,03   | 0,02  | -0,01                     |
| Railways                       | 13,04   | 13,04   | 0,21   | 0,21  | 0,00                      |
| Road Networks                  | 63,97   | 64,42   | 1,03   | 1,04  | 0,01                      |
| Urban center                   | 10,18   | 10,18   | 0,16   | 0,16  | 0,00                      |
| Urban discontinuous            | 217,80  | 228,78  | 3,52   | 3,70  | 0,18                      |
| Non-Irrigated herbaceous crops | 2,22    | 4,74    | 0,04   | 0,08  | 0,04                      |
| Non-Citric fruit trees         | 22,24   | 18,56   | 0,36   | 0,30  | -0,06                     |
| Non predefined mosaic          | 1872,18 | 2433,13 | 30,29  | 39,37 | 9,08                      |
| Olives                         | 8,53    |         | 0,14   | 0,00  | -0,14                     |
| Pastures                       | 2089,25 | 1977,48 | 33,80  | 32,00 | -1,81                     |
| Conifers                       | 216,57  | 216,57  | 3,50   | 3,50  | 0,00                      |
| Primary Forest                 | 1360,53 | 867,26  | 22,01  | 14,03 | -7,98                     |
| Scrub                          | 210,02  | 208,35  | 3,40   | 3,37  | -0,03                     |
| Soil without vegetation        | 47,56   | 32,58   | 0,77   | 0,53  | -0,24                     |
| Extraction or discharge zones  |         | 37,75   | 0,00   | 0,61  | 0,61                      |
| Mining zones                   | 4,34    | 27,06   | 0,07   | 0,44  | 0,37                      |
| Rocky soil                     | 2,95    | 2,95    | 0,05   | 0,05  | 0,00                      |
| Sandy beaches                  | 1,10    | 1,10    | 0,02   | 0,02  | 0,00                      |
| Marine cliffs                  | 36,33   | 35,87   | 0,59   | 0,58  | -0,01                     |
| TOTAL                          | 6180,40 |         |        |       |                           |

7.98% of forest association and 1.81% of grassland areas have been lost. Crop mosaics have increased by 9.08% and the landfill with its treatment plant has been installed within an area equal to 0.61% of the total study area.

Campello landfill WEI evolution

2005

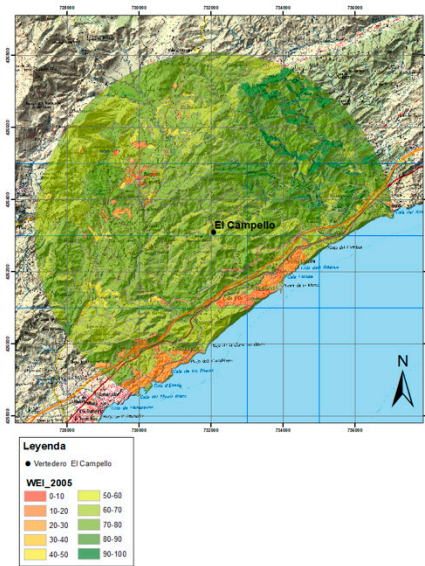

2009

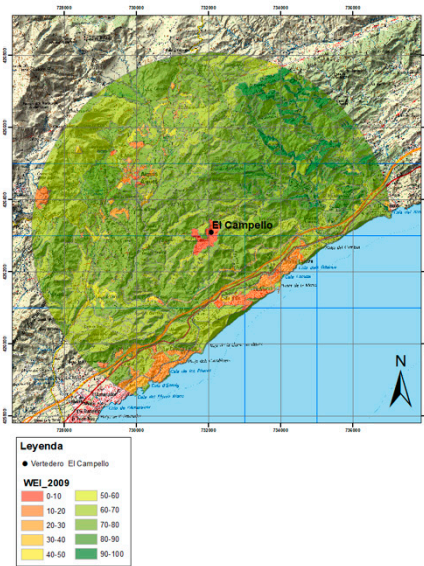

2015

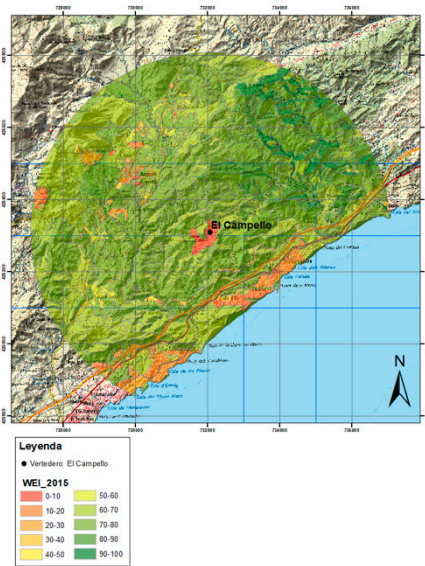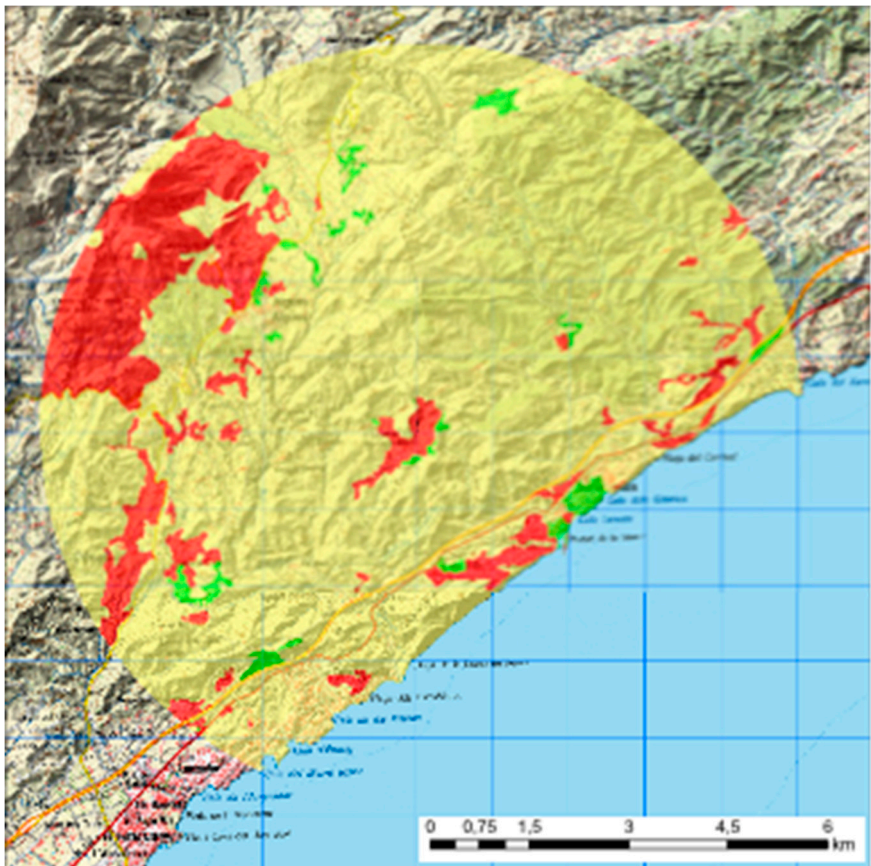

WEI change 2005-2015

- Negative value
- No change
- Positive value

## Caudete de las Fuentes landfill LCM

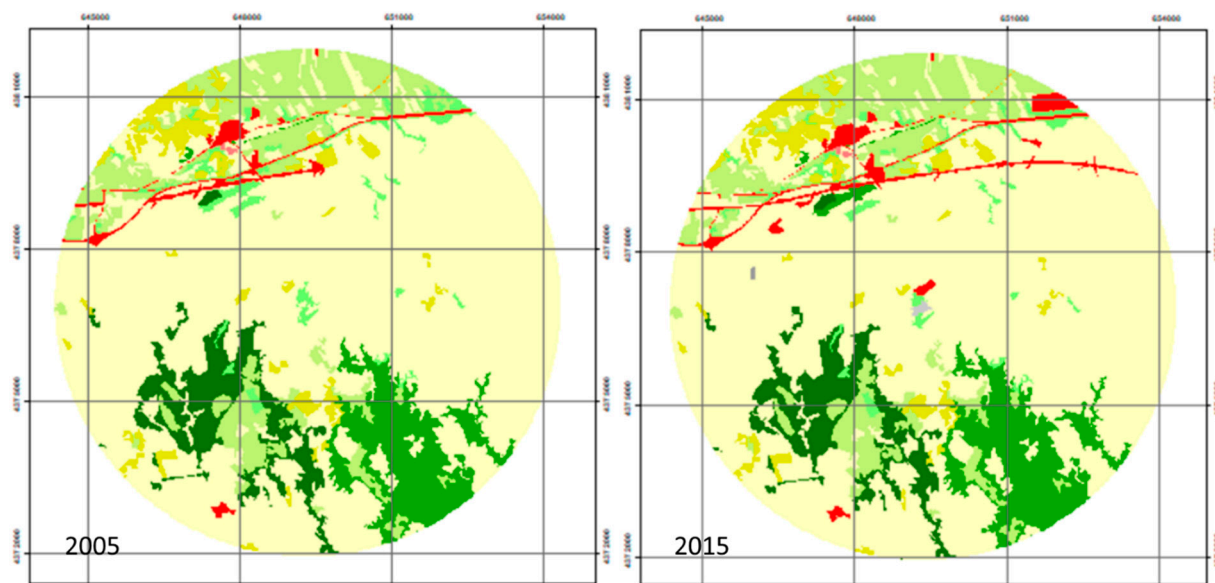

| Category                       | 2005    | 2015    | 2005   | 2015  | Differences |
|--------------------------------|---------|---------|--------|-------|-------------|
|                                | Has     |         | % Area |       | % 2015-2005 |
| Isolated industrial area       | 6,40    | 28,76   | 0,08   | 0,37  | 0,28        |
| Railways                       | 33,52   | 55,72   | 0,43   | 0,71  | 0,28        |
| Road Networks                  | 57,65   | 57,65   | 0,73   | 0,73  | 0,00        |
| Well sorted industrial area    | 1,28    | 26,26   | 0,02   | 0,33  | 0,32        |
| Urban center                   | 29,00   | 31,06   | 0,37   | 0,40  | 0,03        |
| Urban discontinuous            | 4,02    | 4,02    | 0,05   | 0,05  | 0,00        |
| Non-Irrigated herbaceous crops | 51,07   | 42,36   | 0,65   | 0,54  | -0,11       |
| Non-Citric fruit trees         | 276,46  | 276,98  | 3,52   | 3,53  | 0,01        |
| Non predefined mosaic          | 5354,82 | 5325,37 | 68,18  | 67,81 | -0,37       |
| Olives                         | 898,11  | 875,17  | 11,44  | 11,14 | -0,29       |
| Pastures                       | 192,22  | 152,94  | 2,45   | 1,95  | -0,50       |
| Conifers                       | 425,50  | 425,86  | 5,42   | 5,42  | 0,00        |
| Primary Forest                 | 520,92  | 540,74  | 6,63   | 6,89  | 0,25        |
| Scrub                          | 2,80    | 2,80    | 0,04   | 0,04  | 0,00        |
| Extraction or discharge zones  |         | 2,53    | 0,00   | 0,03  | 0,03        |
| Mining zones                   |         | 5,55    | 0,00   | 0,07  | 0,07        |
| TOTAL                          | 7853,77 |         |        |       |             |

0.5% of pasture areas have been lost. Urban zones have increased 0.91% with respect to the total study area.



Caudete de las Fuentes landfill WEI evolution

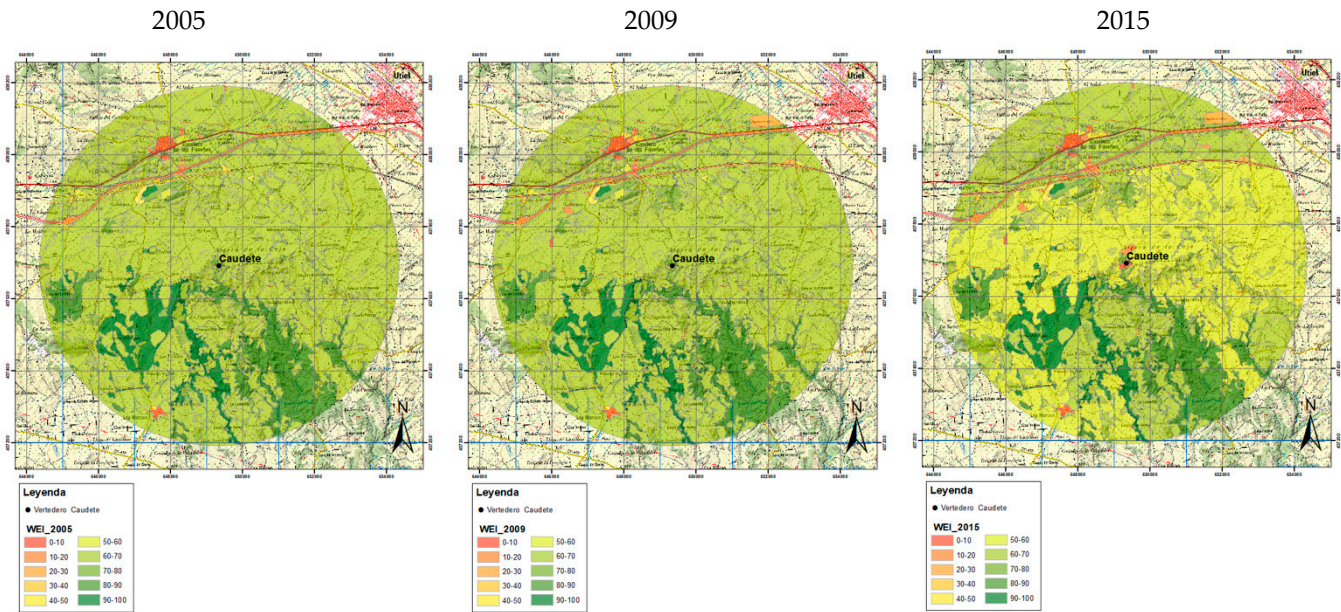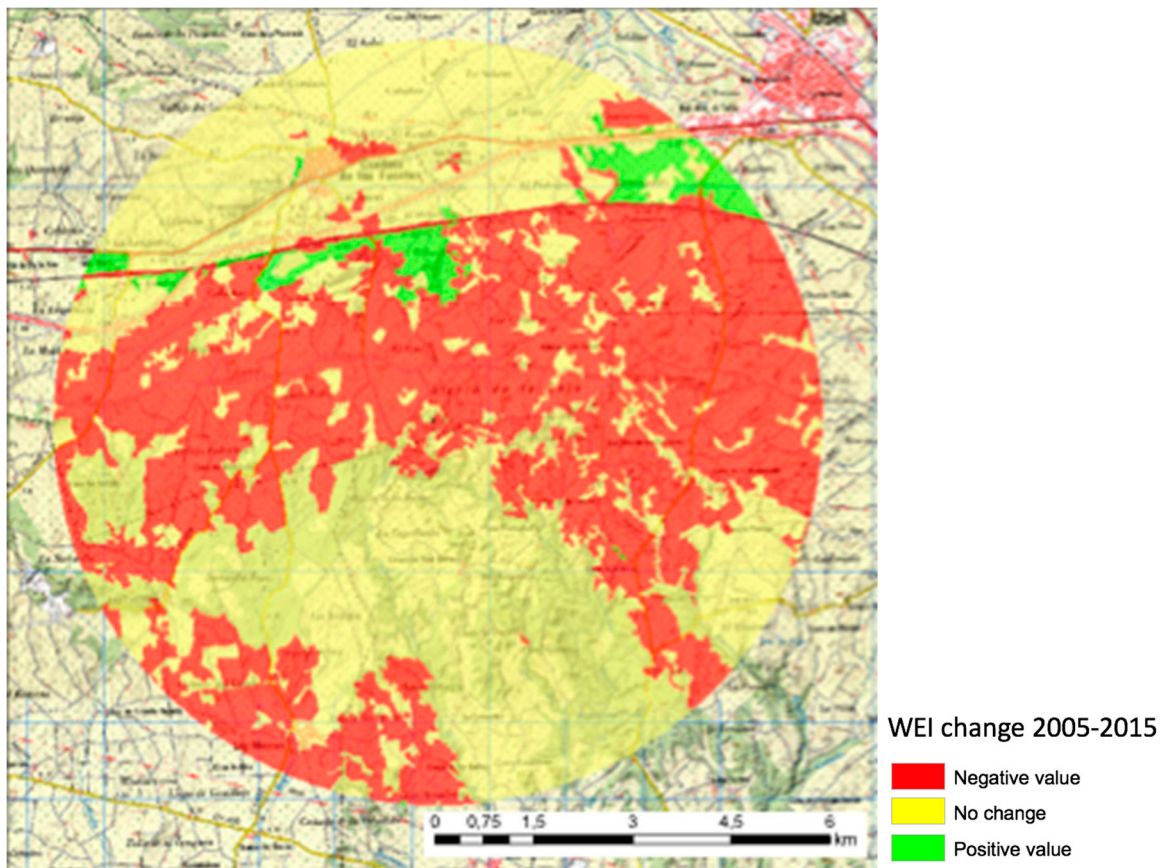



## Cervera del Maestre landfill LCM

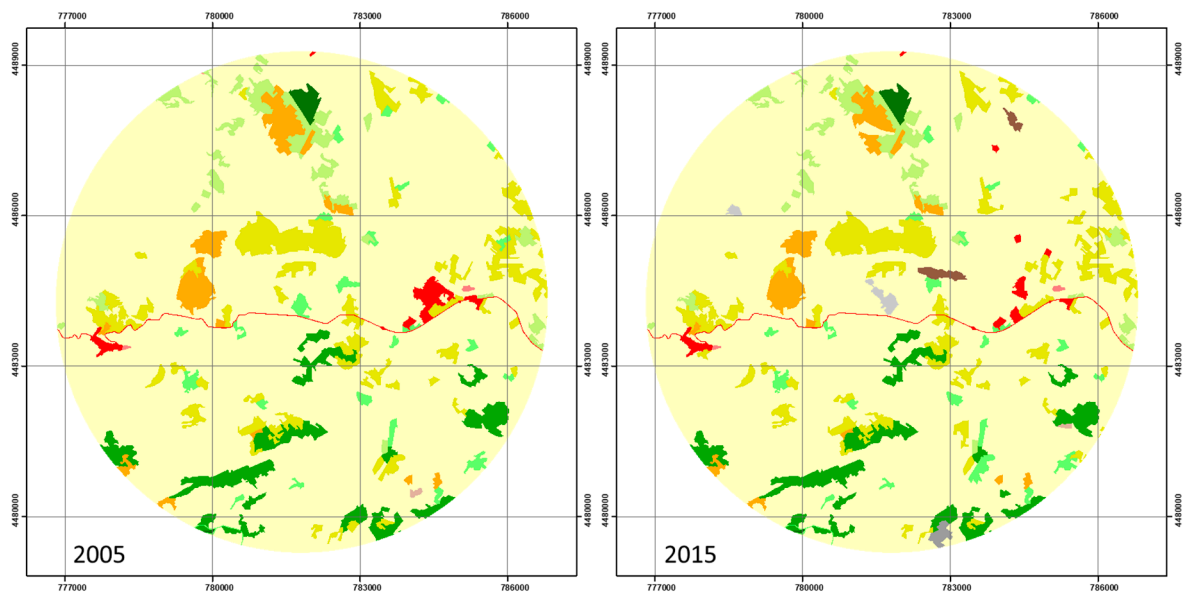

| Category                       | 2005    | 2015    | 2005   | 2015  | Diferences %<br>2015-2005 |
|--------------------------------|---------|---------|--------|-------|---------------------------|
|                                | Has     |         | % Area |       |                           |
| Isolated industrial area       | 9,91    | 13,32   | 0,13   | 0,17  | 0,04                      |
| Road Networks                  | 19,22   | 19,22   | 0,24   | 0,24  | 0,00                      |
| Urban center                   | 43,45   | 23,96   | 0,55   | 0,31  | -0,25                     |
| Urban discontinuous            | 3,69    | 3,69    | 0,05   | 0,05  | 0,00                      |
| Non-Irrigated herbaceous crops | 17,65   | 33,54   | 0,22   | 0,43  | 0,20                      |
| Non-Citric fruit trees         | 352,86  | 346,19  | 4,49   | 4,41  | -0,08                     |
| Citric fruit trees             | 169,89  | 187,66  | 2,16   | 2,39  | 0,23                      |
| Non predefined mosaic          | 6447,43 | 6396,79 | 82,09  | 81,45 | -0,64                     |
| Olives                         | 192,78  | 192,78  | 2,45   | 2,45  | 0,00                      |
| Pastures                       | 111,14  | 104,51  | 1,42   | 1,33  | -0,08                     |
| Conifers                       | 27,54   | 27,54   | 0,35   | 0,35  | 0,00                      |
| Primary Forest                 | 278,68  | 278,71  | 3,55   | 3,55  | 0,00                      |
| Scrub                          | 176,39  | 166,68  | 2,25   | 2,12  | -0,12                     |
| Bare soil                      | 3,13    | 2,27    | 0,04   | 0,03  | -0,01                     |
| Extraction or discharge zones  |         | 14,08   | 0,00   | 0,18  | 0,18                      |
| Burned zones                   |         | 22,81   | 0,00   | 0,29  | 0,29                      |
| Mining zones                   |         | 20,02   | 0,00   | 0,25  | 0,25                      |
| TOTAL                          | 7853,77 |         |        |       |                           |

0.64% of non-predefined mosaic areas have been lost. Urban zones have decreased 0.21% with respect to the total study area. Mining zones and extraction zones have increased 0.43% of the study area.

Cervera del Maestre landfill WEI evolution

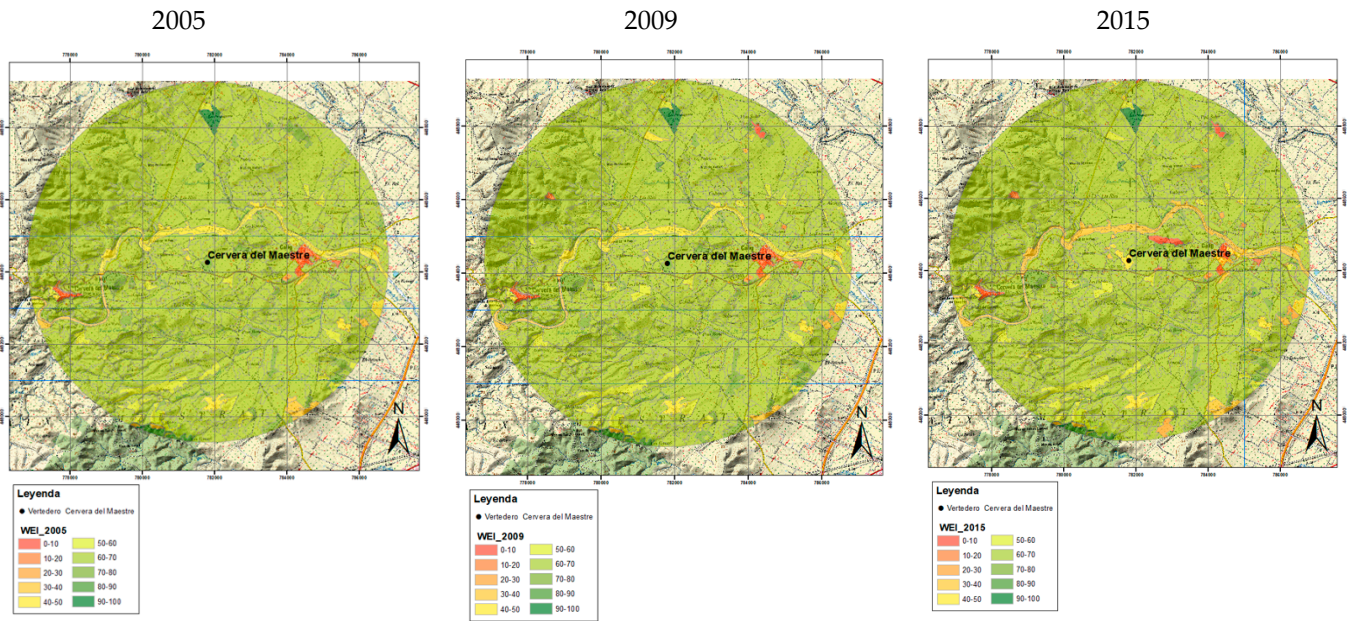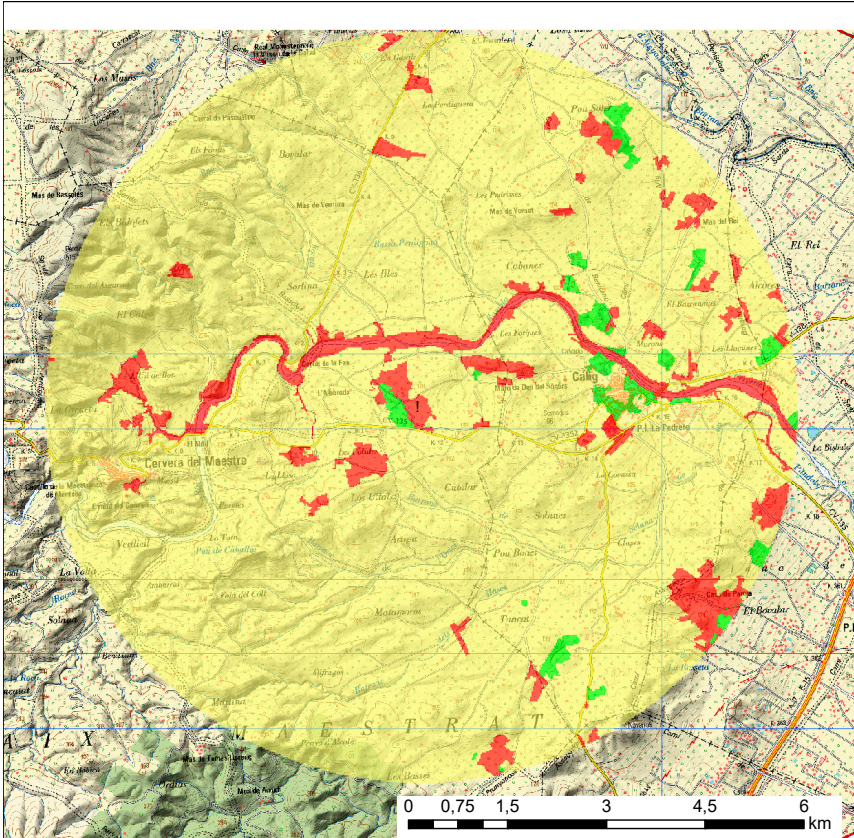

## Dos Aguas landfill LCM

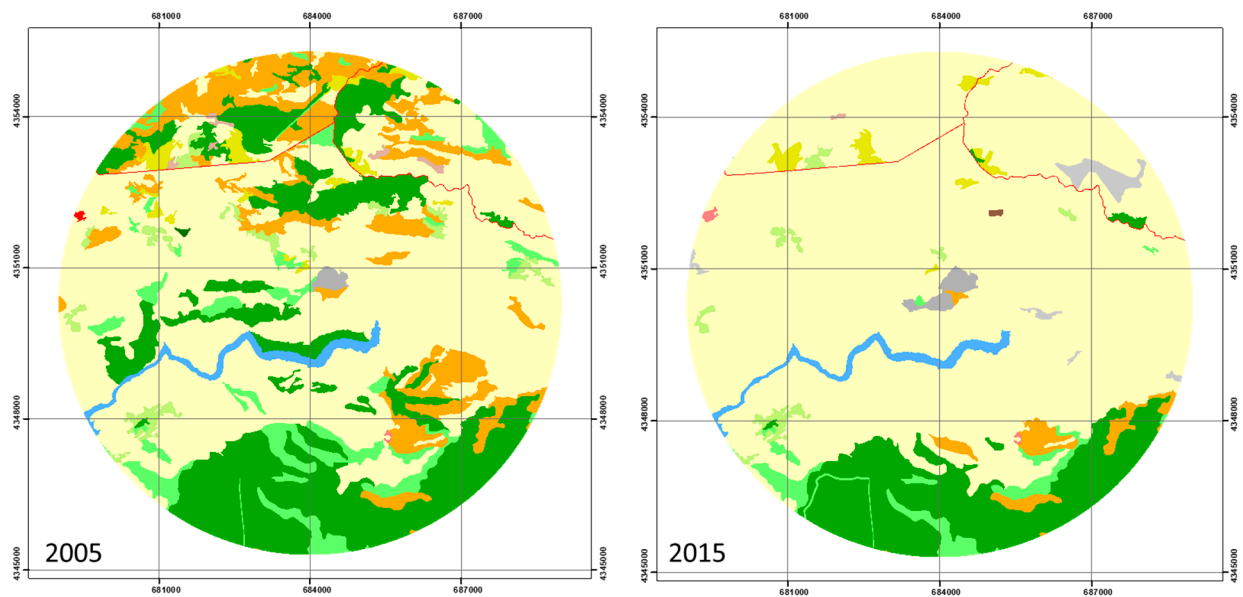

| Category                      | 2005    | 2015    | 2005   | 2015  | Differences %<br>2015-2005 |
|-------------------------------|---------|---------|--------|-------|----------------------------|
|                               | Has     |         | % Area |       |                            |
| Rocky soil                    |         | 77,19   | 0,00   | 0,98  | 0,98                       |
| Road Networks                 | 20,31   | 20,31   | 0,26   | 0,26  | 0,00                       |
| Urban center                  | 3,10    |         | 0,04   | 0,00  | -0,04                      |
| Urban discontinuous           | 1,89    | 7,26    | 0,02   | 0,09  | 0,07                       |
| Non-Citric fruit trees        | 120,28  | 80,80   | 1,53   | 1,03  | -0,50                      |
| Non predefined mosaic         | 4262,33 | 6177,94 | 54,27  | 78,66 | 24,39                      |
| Olives                        | 139,92  | 77,38   | 1,78   | 0,99  | -0,80                      |
| Pastures                      | 489,87  | 199,50  | 6,24   | 2,54  | -3,70                      |
| Conifers                      | 2,92    |         | 0,04   | 0,00  | -0,04                      |
| Primary Forest                | 1741,98 | 917,59  | 22,18  | 11,68 | -10,50                     |
| Scrub                         | 917,11  | 138,30  | 11,68  | 1,76  | -9,92                      |
| Extraction or discharge zones | 24,02   | 48,65   | 0,31   | 0,62  | 0,31                       |
| Bare soil                     | 23,10   | 2,64    | 0,29   | 0,03  | -0,26                      |
| Dams and artificial lakes     | 104,08  | 100,06  | 1,33   | 1,27  | -0,05                      |
| Hydroelectric plant           | 2,87    | 2,80    | 0,04   | 0,04  | 0,00                       |
| Burned areas                  |         | 3,36    | 0,00   | 0,04  | 0,04                       |
| TOTAL                         | 7853,77 |         |        |       |                            |

2015 land use data, although official, has inconsistencies that do not allow a real analysis of the land use change.



Dos Aguas landfill WEI evolution

2005

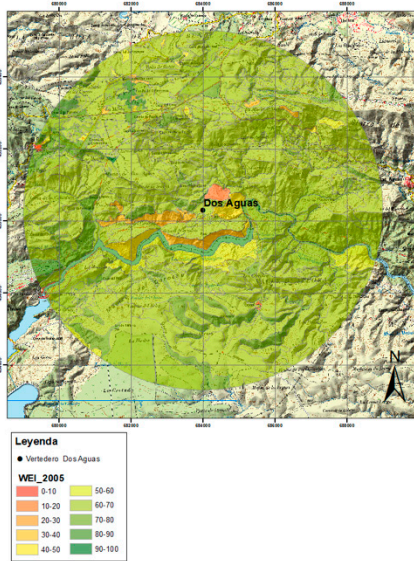

2009

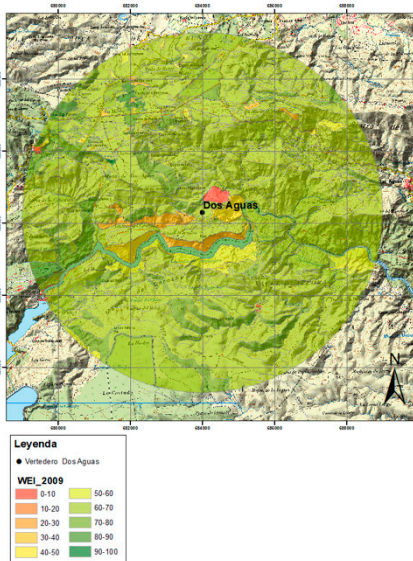

2015

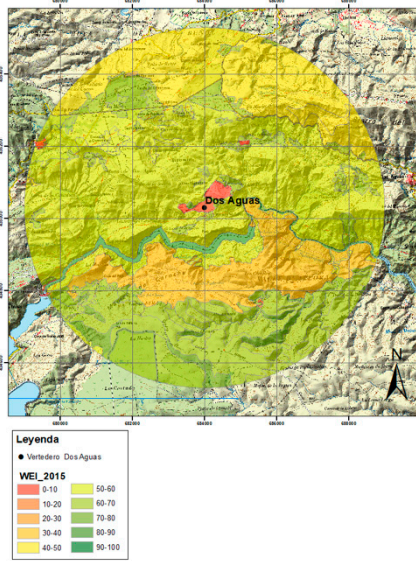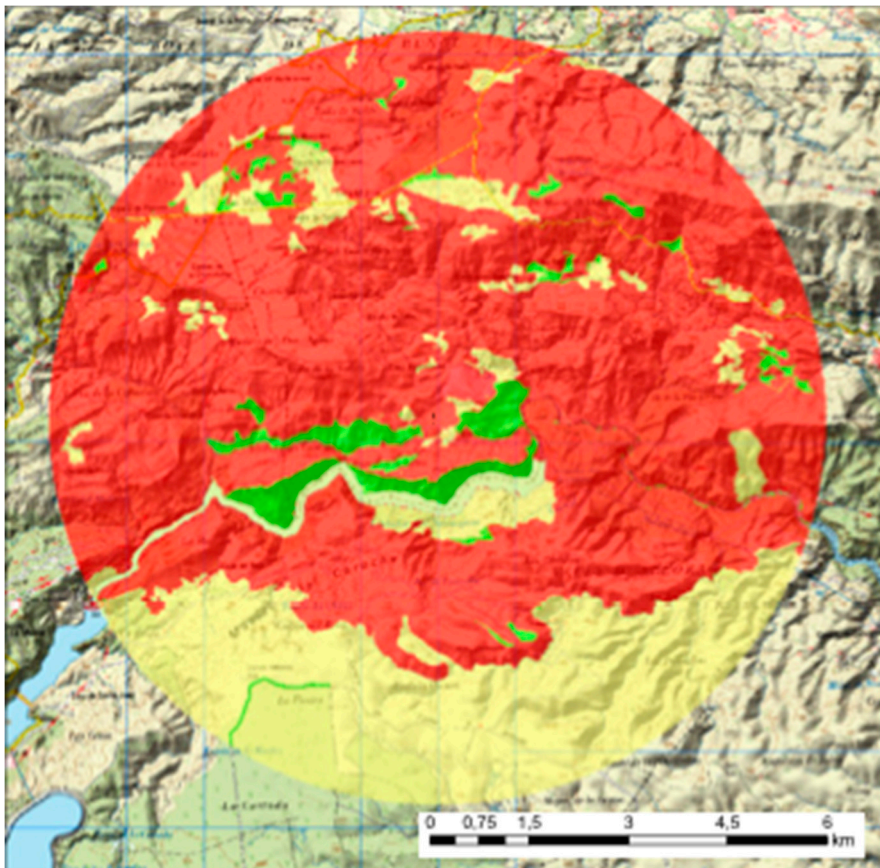



## Elche landfill LCM

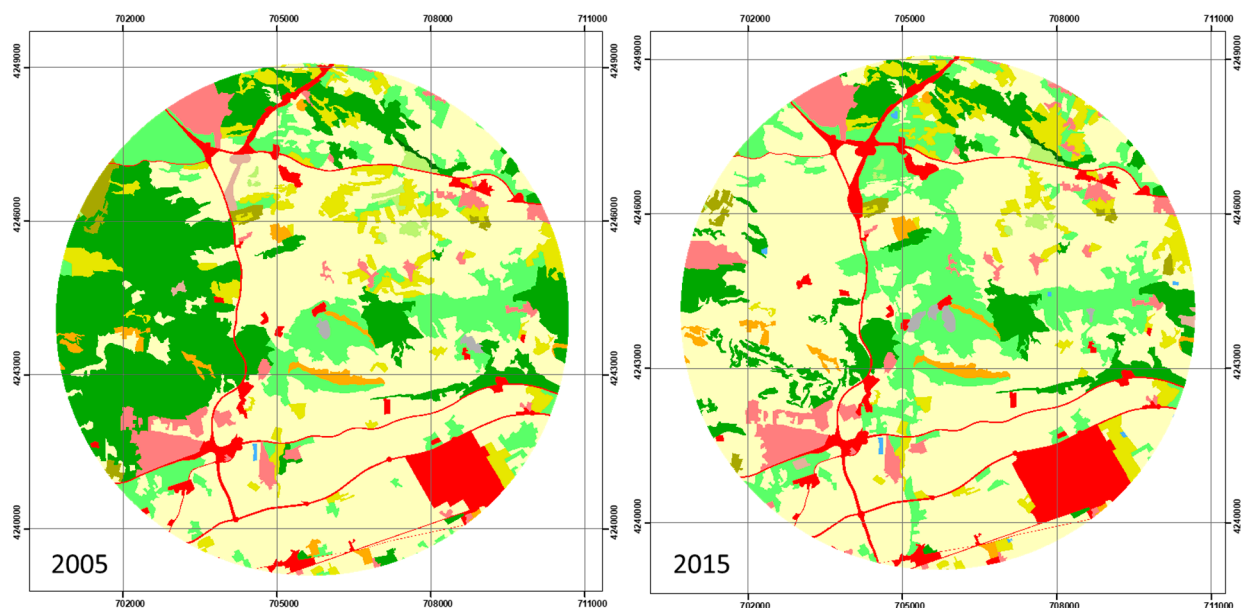

| Category                       | 2005    | 2015    | 2005   | 2015  | Differences %<br>2015-2005 |
|--------------------------------|---------|---------|--------|-------|----------------------------|
|                                | Has     |         | % Area |       |                            |
| Isolated industrial area       | 26,81   | 46,10   | 0,34   | 0,59  | 0,25                       |
| Railways                       | 4,69    | 4,69    | 0,06   | 0,06  | 0,00                       |
| Road Networks                  | 189,19  | 221,80  | 2,41   | 2,82  | 0,42                       |
| Well sorted industrial area    | 216,24  | 286,83  | 2,75   | 3,65  | 0,90                       |
| Urban center                   | 21,93   | 27,76   | 0,28   | 0,35  | 0,07                       |
| Urban discontinuous            | 308,54  | 360,61  | 3,93   | 4,59  | 0,66                       |
| Citric fruit trees             | 61,80   | 84,24   | 0,79   | 1,07  | 0,29                       |
| Non-Citric fruit trees         | 432,54  | 329,50  | 5,51   | 4,20  | -1,31                      |
| Non predefined mosaic          | 3266,95 | 4074,82 | 41,60  | 51,88 | 10,29                      |
| Non-Irrigated herbaceous crops | 292,27  | 282,18  | 3,72   | 3,59  | -0,13                      |
| Olives                         | 46,98   | 34,71   | 0,60   | 0,44  | -0,16                      |
| Vineyard                       | 68,83   | 49,90   | 0,88   | 0,64  | -0,24                      |
| Pastures                       | 915,64  | 1149,11 | 11,66  | 14,63 | 2,97                       |
| Conifers                       | 6,90    | 6,90    | 0,09   | 0,09  | 0,00                       |
| Primary Forest                 | 1850,69 | 748,47  | 23,56  | 9,53  | -14,03                     |
| Scrub                          | 102,16  | 100,84  | 1,30   | 1,28  | -0,02                      |
| Extraction or discharge zones  | 15,29   | 22,81   | 0,19   | 0,29  | 0,10                       |
| Mining zones                   |         | 2,44    | 0,00   | 0,03  | 0,03                       |
| Bare soil                      | 23,70   | 11,86   | 0,30   | 0,15  | -0,15                      |
| Artificial water surface       | 2,62    | 8,19    | 0,03   | 0,10  | 0,07                       |
| TOTAL                          | 7853,77 |         |        |       |                            |

14.03% of forestry associations and 1.3% of fruit trees areas have been lost. Crop surfaces have increased by 10.29% and pastures by 2.97% with respect to the total study area.

Elche landfill WEI evolution

2005

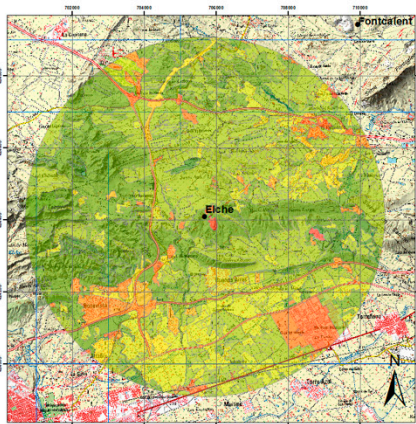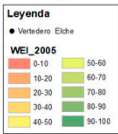

2009

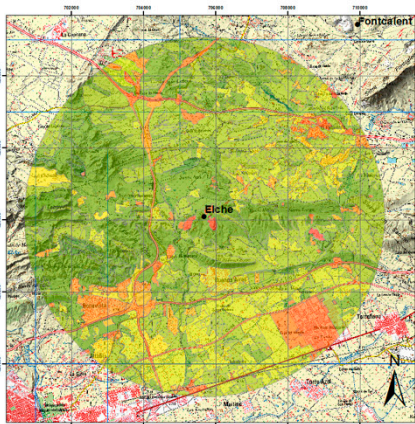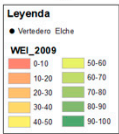

2015

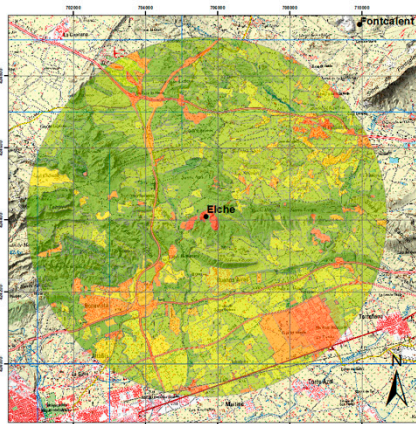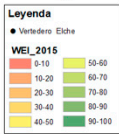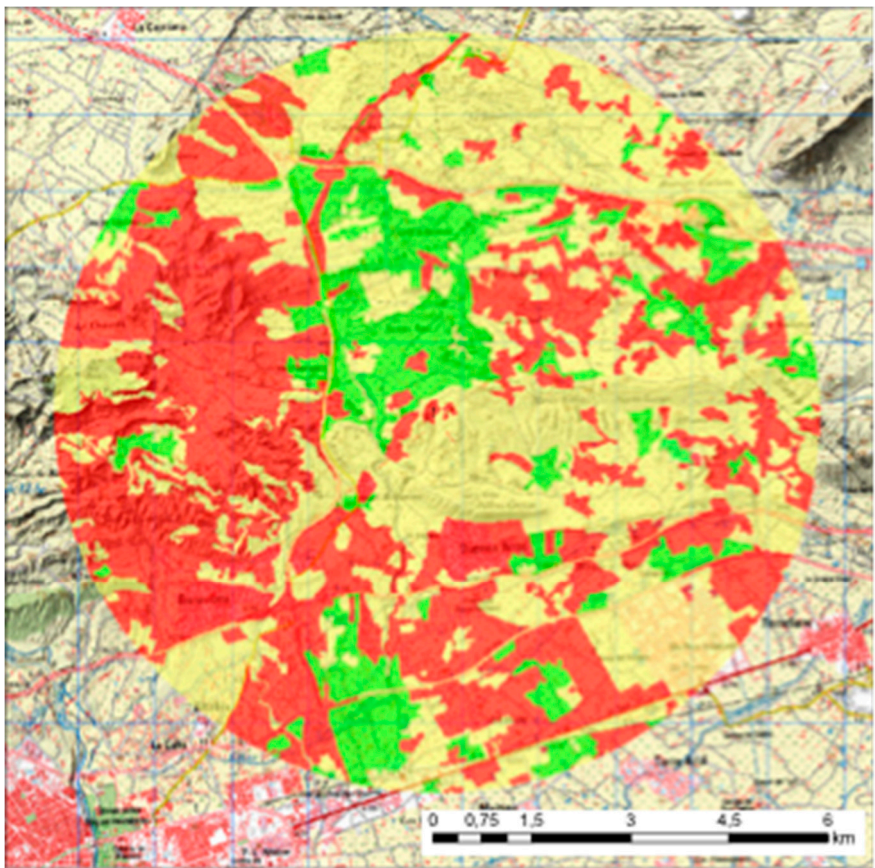

WEI change 2005-2015

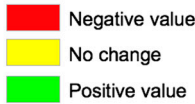

## Fontcalent landfill LCM

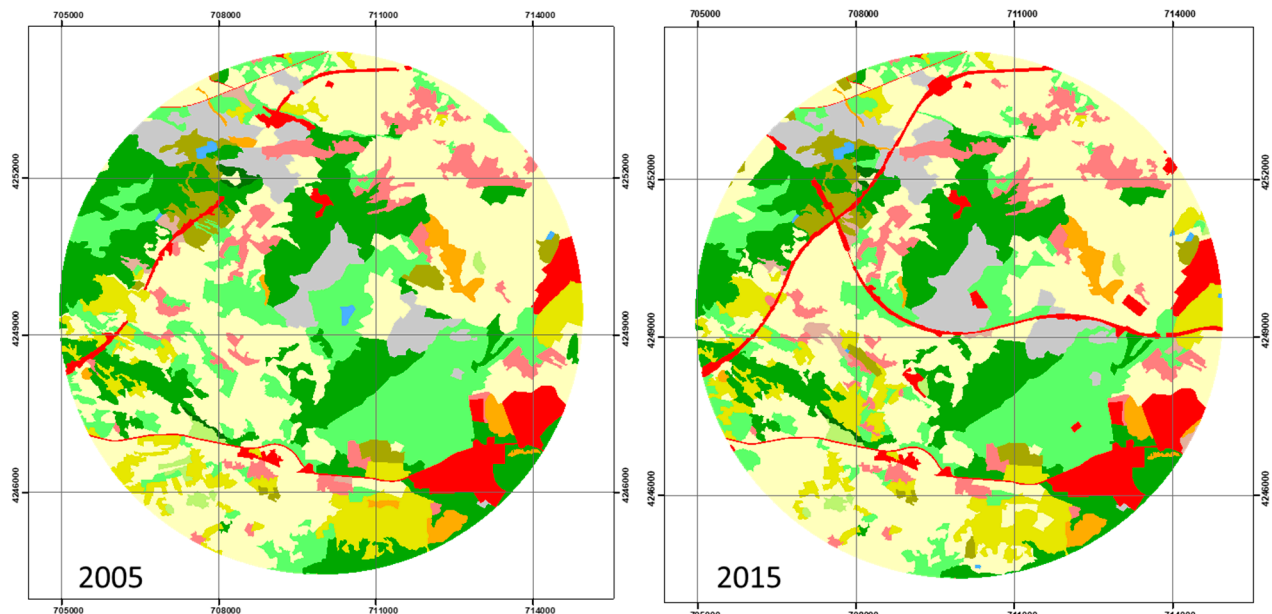

| Category                       | 2005    | 2015    | 2005   | 2015  | Differences %<br>2015-2005 |
|--------------------------------|---------|---------|--------|-------|----------------------------|
|                                | Has     |         | % Area |       |                            |
| Isolated industrial area       | 78,49   | 98,46   | 1,00   | 1,25  | 0,25                       |
| Railways                       | 4,46    | 75,41   | 0,06   | 0,96  | 0,90                       |
| Road Networks                  | 103,69  | 114,41  | 1,32   | 1,46  | 0,14                       |
| Well sorted industrial area    | 220,71  | 227,23  | 2,81   | 2,89  | 0,08                       |
| Urban center                   | 12,84   | 13,41   | 0,16   | 0,17  | 0,01                       |
| Urban discontinuous            | 419,00  | 427,96  | 5,33   | 5,45  | 0,11                       |
| Citric fruit trees             | 232,60  | 215,30  | 2,96   | 2,74  | -0,22                      |
| Non-Citric fruit trees         | 310,01  | 361,15  | 3,95   | 4,60  | 0,65                       |
| Non predefined mosaic          | 2689,61 | 2833,47 | 34,25  | 36,08 | 1,83                       |
| Non-Irrigated herbaceous crops | 103,31  | 167,82  | 1,32   | 2,14  | 0,82                       |
| Olives                         | 48,74   | 43,67   | 0,62   | 0,56  | -0,06                      |
| Vineyard                       | 192,25  | 182,98  | 2,45   | 2,33  | -0,12                      |
| Pastures                       | 1334,40 | 1118,14 | 16,99  | 14,24 | -2,75                      |
| Conifers                       | 23,11   | 15,24   | 0,29   | 0,19  | -0,10                      |
| Primary Forest                 | 1451,75 | 1280,55 | 18,48  | 16,30 | -2,18                      |
| Scrub                          | 147,24  | 136,11  | 1,87   | 1,73  | -0,14                      |
| Extraction or discharge zones  |         | 48,73   | 0,00   | 0,62  | 0,62                       |
| Mining zones                   | 429,81  | 426,05  | 5,47   | 5,42  | -0,05                      |
| Bare soil                      | 33,75   | 53,72   | 0,43   | 0,68  | 0,25                       |
| Artificial water surface       | 18,00   | 13,96   | 0,23   | 0,18  | -0,05                      |
| TOTAL                          | 7853,77 |         |        |       |                            |

2.75% of grassland and 2.18% of forest association areas have been lost. Crops have increased by 1.83% with respect to the total study area.



Fontcalent landfill WEI evolution

2005

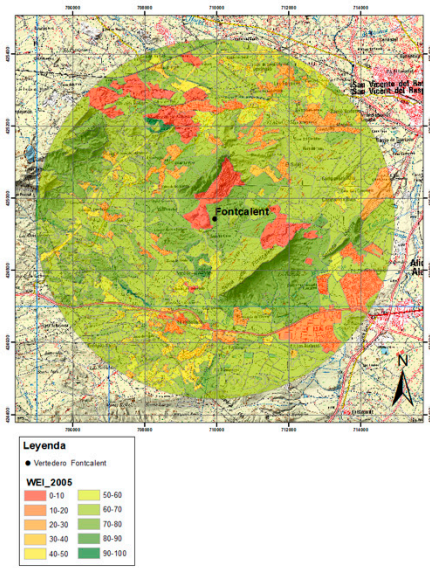

2009

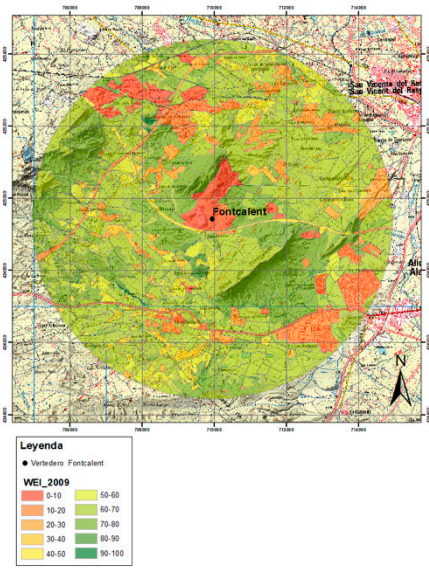

2015

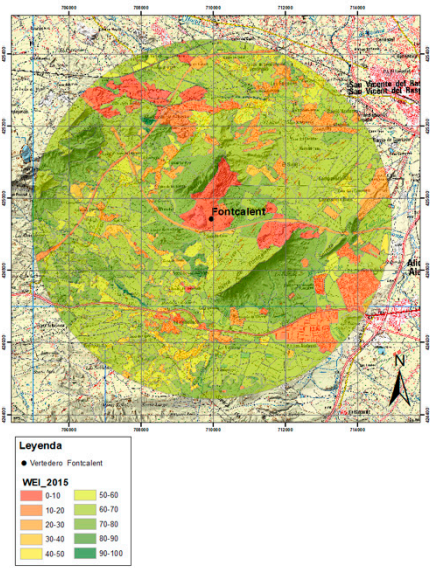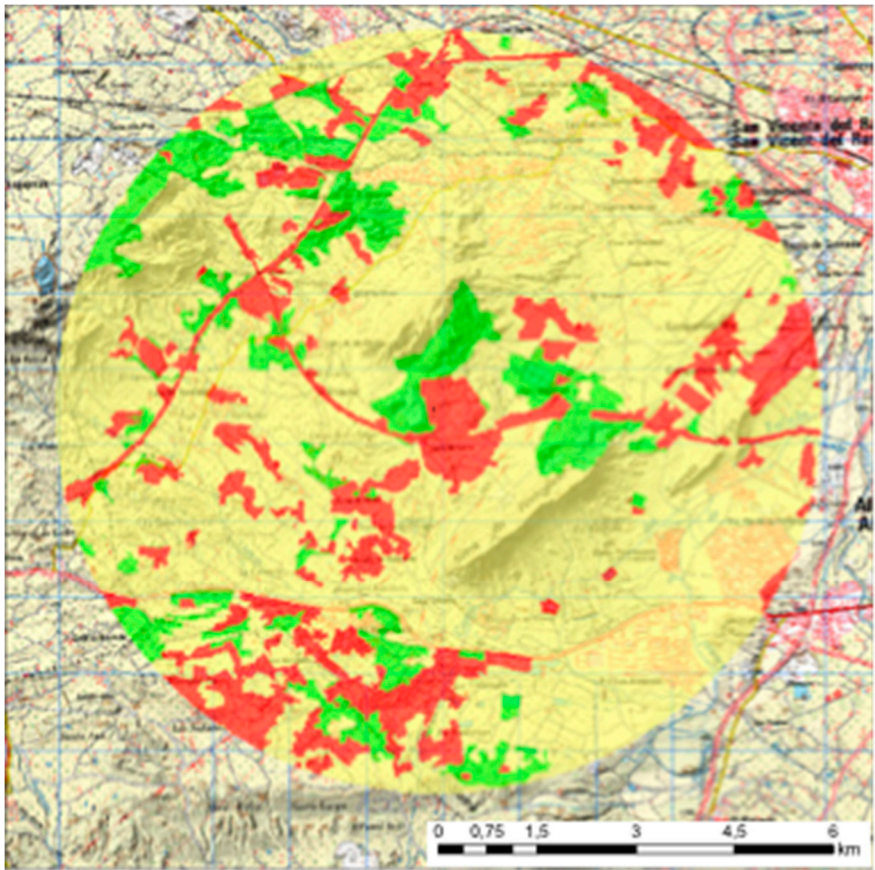



## Onda landfill LCM

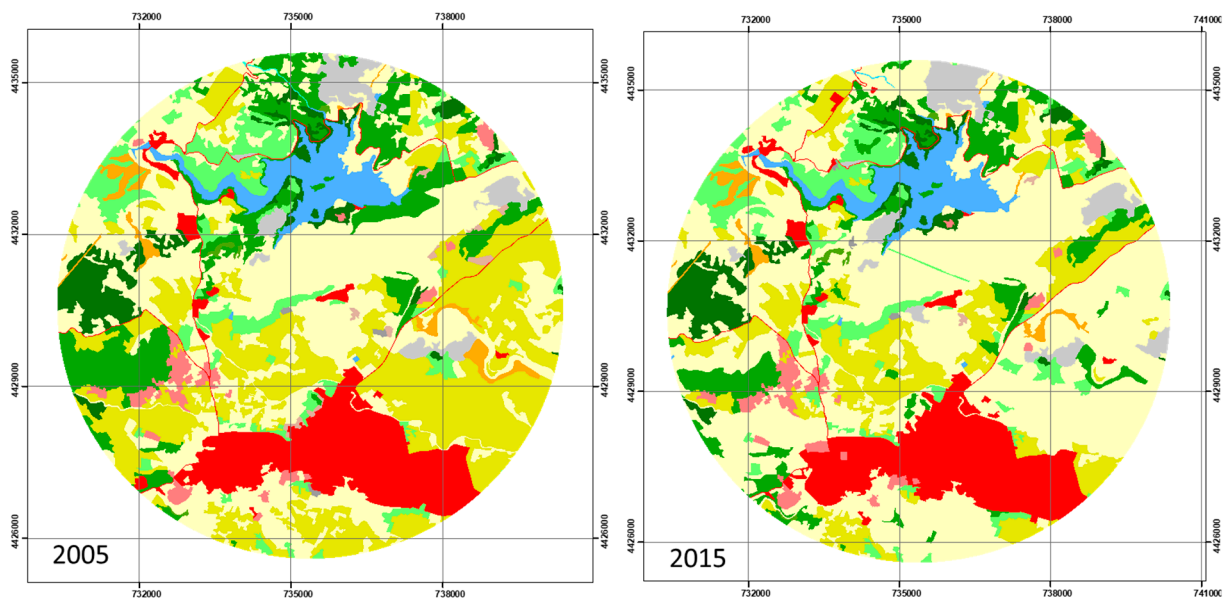

| Category                       | 2005    | 2015    | 2005   | 2015  | Differences %<br>2015-2005 |
|--------------------------------|---------|---------|--------|-------|----------------------------|
|                                | Has     |         | % Area |       |                            |
| Isolated industrial area       | 49,68   | 54,18   | 0,63   | 0,69  | 0,06                       |
| Road Networks                  | 64,30   | 65,67   | 0,82   | 0,84  | 0,02                       |
| Well sorted industrial area    | 585,06  | 598,75  | 7,45   | 7,62  | 0,17                       |
| Urban center                   | 161,35  | 163,13  | 2,05   | 2,08  | 0,02                       |
| Urban discontinuous            | 139,47  | 149,12  | 1,78   | 1,90  | 0,12                       |
| Citric fruit trees             | 1971,98 | 979,80  | 25,11  | 12,48 | -12,63                     |
| Non-Citric fruit trees         | 1,87    | 1,87    | 0,02   | 0,02  | 0,00                       |
| Non predefined mosaic          | 2543,34 | 3752,76 | 32,38  | 47,78 | 15,40                      |
| Non-Irrigated herbaceous crops | 35,52   | 4,80    | 0,45   | 0,06  | -0,39                      |
| Pastures                       | 520,05  | 508,34  | 6,62   | 6,47  | -0,15                      |
| Conifers                       | 313,48  | 310,26  | 3,99   | 3,95  | -0,04                      |
| Hardwood evergreen             | 13,75   | 13,75   | 0,18   | 0,18  | 0,00                       |
| Primary Forest                 | 786,79  | 595,85  | 10,02  | 7,59  | -2,43                      |
| Scrub                          | 114,16  | 82,41   | 1,45   | 1,05  | -0,40                      |
| Extraction or discharge zones  | 8,29    | 5,62    | 0,11   | 0,07  | -0,03                      |
| Mining zones                   | 198,32  | 248,61  | 2,53   | 3,17  | 0,64                       |
| Rocky soil                     | 3,07    | 3,07    | 0,04   | 0,04  | 0,00                       |
| Bare soil                      | 31,55   | 5,81    | 0,40   | 0,07  | -0,33                      |
| Ravines                        | 3,91    | 2,50    | 0,05   | 0,03  | -0,02                      |
| Dams and artificial lakes      | 304,50  | 303,80  | 3,88   | 3,87  | -0,01                      |
| Artificial water surface       | 3,34    | 3,67    | 0,04   | 0,05  | 0,00                       |
| TOTAL                          | 7853,77 |         |        |       |                            |

12.63% of grassland, 2.18% of fruit-bearing areas and 2.43% of primary forests have been lost. Crops have increased by 15.40%, with respect to the total study area.

Onda landfill WEI evolution

2005

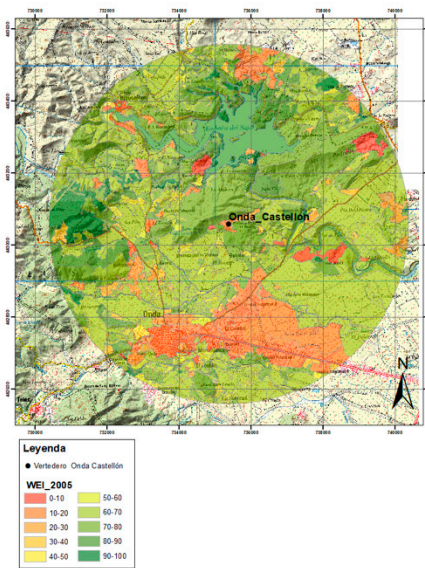

2009

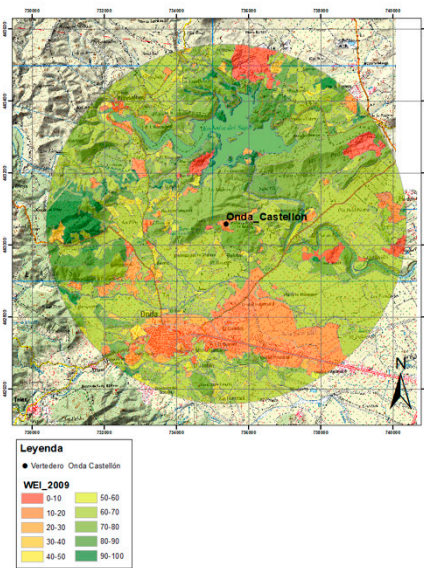

2015

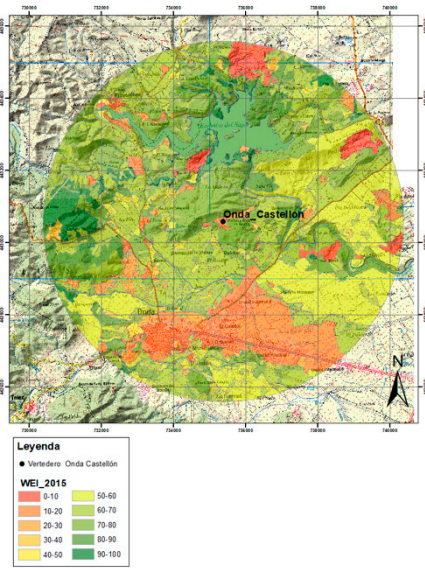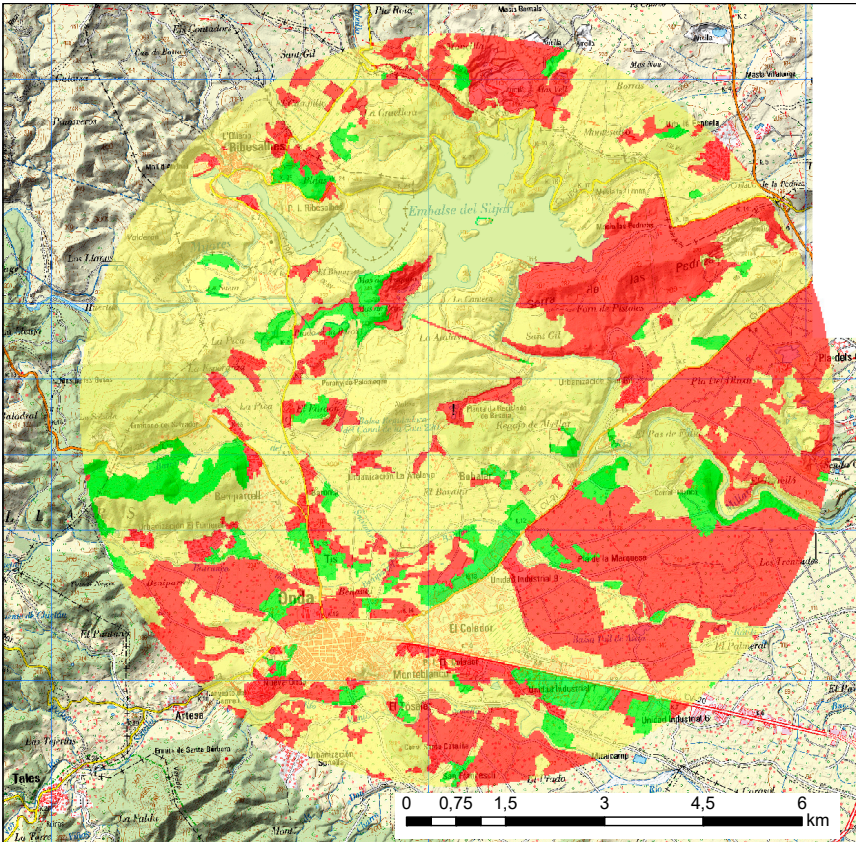

WEI change 2005-2015

- Negative value
- No change
- Positive value



## Villena landfill LCM

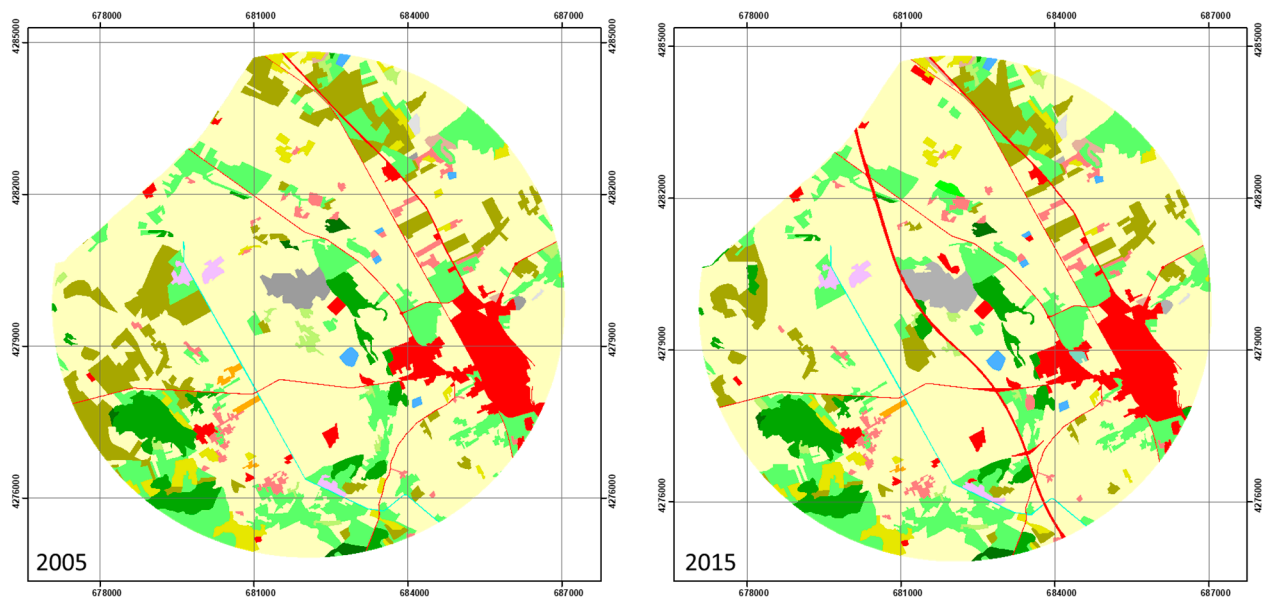

| Category                       | 2005    | 2015    | 2005   | 2015  | Differences<br>% 2015-<br>2005 |
|--------------------------------|---------|---------|--------|-------|--------------------------------|
|                                | Has     |         | % Area |       |                                |
| Isolated industrial area       | 41,02   | 64,61   | 0,55   | 0,87  | 0,32                           |
| Road Networks                  | 69,04   | 75,14   | 0,93   | 1,01  | 0,08                           |
| Railways                       | 14,72   | 59,85   | 0,20   | 0,81  | 0,61                           |
| Well sorted industrial area    | 89,54   | 91,27   | 1,21   | 1,23  | 0,02                           |
| Urban center                   | 221,45  | 213,43  | 2,99   | 2,88  | -0,11                          |
| Urban discontinuous            | 103,46  | 107,87  | 1,39   | 1,45  | 0,06                           |
| Citric fruit trees             | 2,04    | 2,04    | 0,03   | 0,03  | 0,00                           |
| Non-Citric fruit trees         | 158,77  | 149,10  | 2,14   | 2,01  | -0,13                          |
| Non predefined mosaic          | 2041,90 | 3132,57 | 27,53  | 42,23 | 14,70                          |
| Non-Irrigated herbaceous crops | 2485,06 | 1562,77 | 33,50  | 21,07 | -12,43                         |
| Pastures                       | 950,36  | 902,92  | 12,81  | 12,17 | -0,64                          |
| Golf course                    |         | 8,68    | 0,00   | 0,12  | 0,12                           |
| Primary Forest                 | 296,38  | 322,77  | 4,00   | 4,35  | 0,36                           |
| Conifer                        | 26,37   | 23,31   | 0,36   | 0,31  | -0,04                          |
| Olives                         | 57,96   | 43,91   | 0,78   | 0,59  | -0,19                          |
| Vineyard                       | 669,78  | 448,47  | 9,03   | 6,05  | -2,98                          |
| Scrub                          | 16,13   | 8,45    | 0,22   | 0,11  | -0,10                          |
| Continental salines            | 33,62   | 35,63   | 0,45   | 0,48  | 0,03                           |
| Extraction or discharge zones  | 75,52   | 95,99   | 1,02   | 1,29  | 0,28                           |
| Mining zones                   | 8,14    | 8,70    | 0,11   | 0,12  | 0,01                           |
| Bare soil                      | 16,05   | 19,69   | 0,22   | 0,27  | 0,05                           |
| Channels                       | 17,25   | 17,37   | 0,23   | 0,23  | 0,00                           |
| Artificial water surface       | 22,69   | 22,69   | 0,31   | 0,31  | 0,00                           |
| TOTAL                          | 7417,22 |         |        |       |                                |

12.43% of grassland and 2.98% of vineyard areas have been lost. Crops have increased by 14.70% with respect to the total study area.

Villena landfill WEI evolution

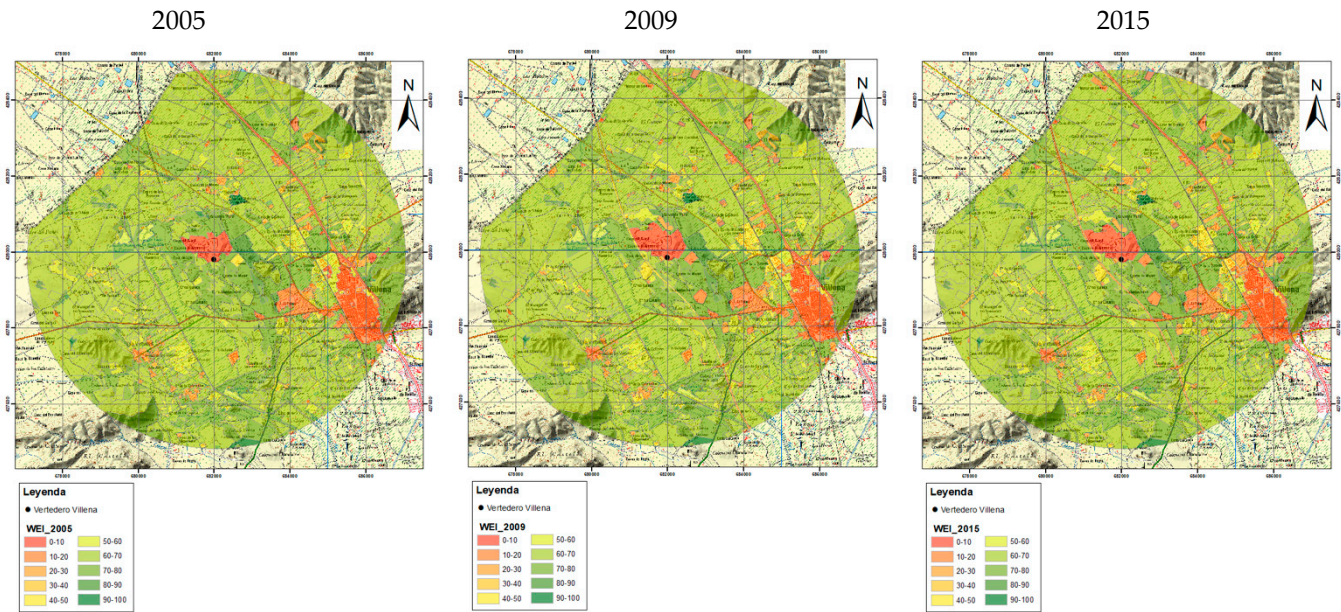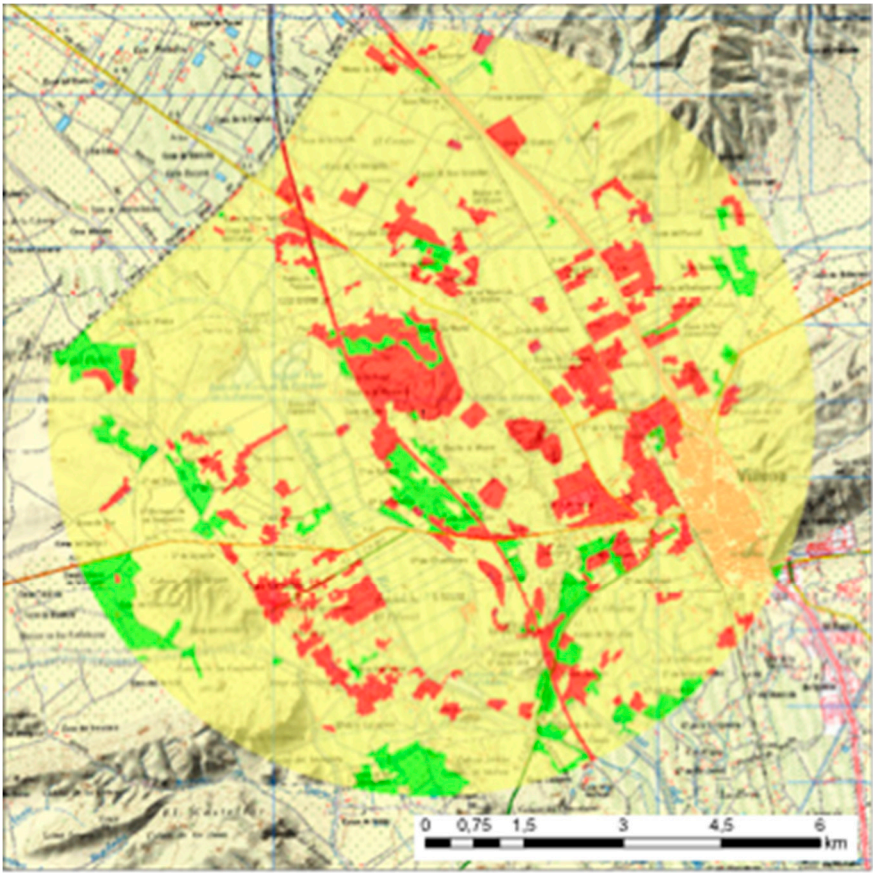

WEI change 2005-2015

- Negative value
- No change
- Positive value



## Xixona landfill LCM

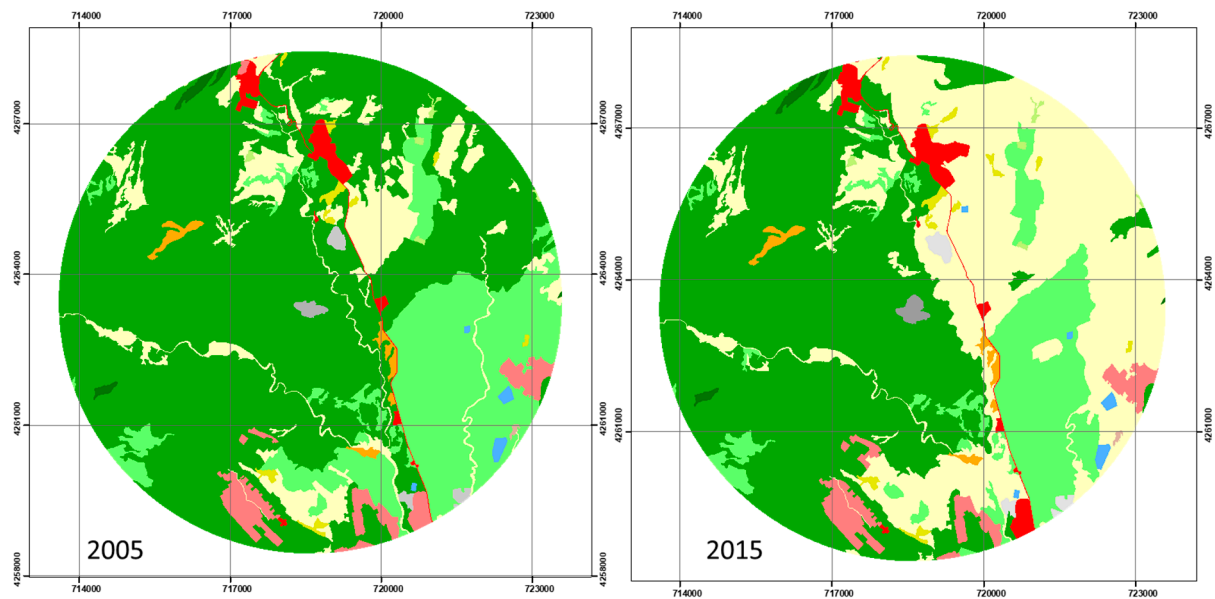

| Category                       | 2005    | 2015    | 2005   | 2015  | Diferences<br>% 2015-<br>2005 |
|--------------------------------|---------|---------|--------|-------|-------------------------------|
|                                | Has     |         | % Area |       |                               |
| Isolated industrial area       | 11,90   | 11,90   | 0,15   | 0,15  | 0,00                          |
| Road Networks                  | 20,41   | 20,27   | 0,26   | 0,26  | 0,00                          |
| Well sorted industrial area    | 53,69   | 98,77   | 0,68   | 1,26  | 0,57                          |
| Urban center                   | 16,61   | 21,16   | 0,21   | 0,27  | 0,06                          |
| Urban discontinuous            | 216,32  | 196,86  | 2,75   | 2,51  | -0,25                         |
| Non-Citric fruit trees         | 38,93   | 47,58   | 0,50   | 0,61  | 0,11                          |
| Non predefined mosaic          | 616,59  | 2522,60 | 7,85   | 32,12 | 24,27                         |
| Non-Irrigated herbaceous crops | 207,82  | 34,41   | 2,65   | 0,44  | -2,21                         |
| Pastures                       | 1483,08 | 999,85  | 18,88  | 12,73 | -6,15                         |
| Primary Forest                 | 5033,25 | 3725,88 | 64,09  | 47,44 | -16,65                        |
| Conifers                       | 28,50   | 28,50   | 0,36   | 0,36  | 0,00                          |
| Olives                         | 12,85   | 12,85   | 0,16   | 0,16  | 0,00                          |
| Scrub                          | 47,74   | 47,74   | 0,61   | 0,61  | 0,00                          |
| Extraction or discharge zones  | 14,83   | 22,50   | 0,19   | 0,29  | 0,10                          |
| Mining zones                   | 28,44   | 38,41   | 0,36   | 0,49  | 0,13                          |
| Bare soil                      | 2,61    | 2,61    | 0,03   | 0,03  | 0,00                          |
| Artificial water surface       | 20,22   | 21,90   | 0,26   | 0,28  | 0,02                          |
| TOTAL                          | 7853,77 |         |        |       |                               |

16.65% of forest, 6.15% of grassland areas and 2.21% of rainfed herbaceous crops have been lost. Crop mosaics have increased by 24.27% with respect to the total study area.

Xixona landfill WEI evolution

2005

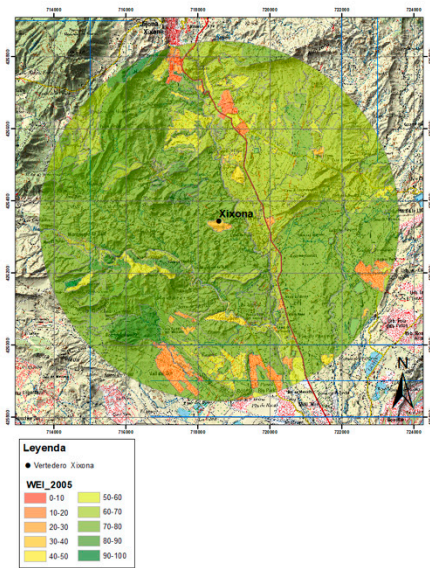

2009

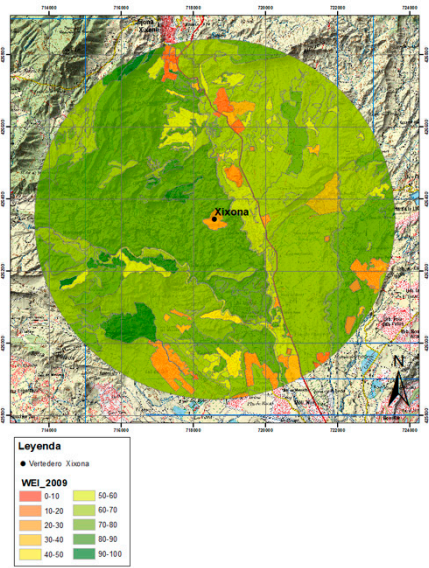

2015

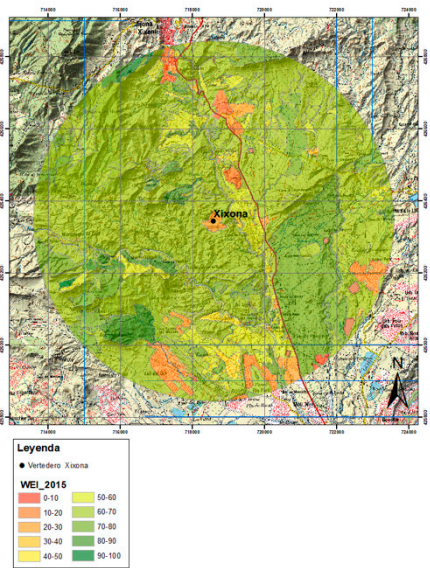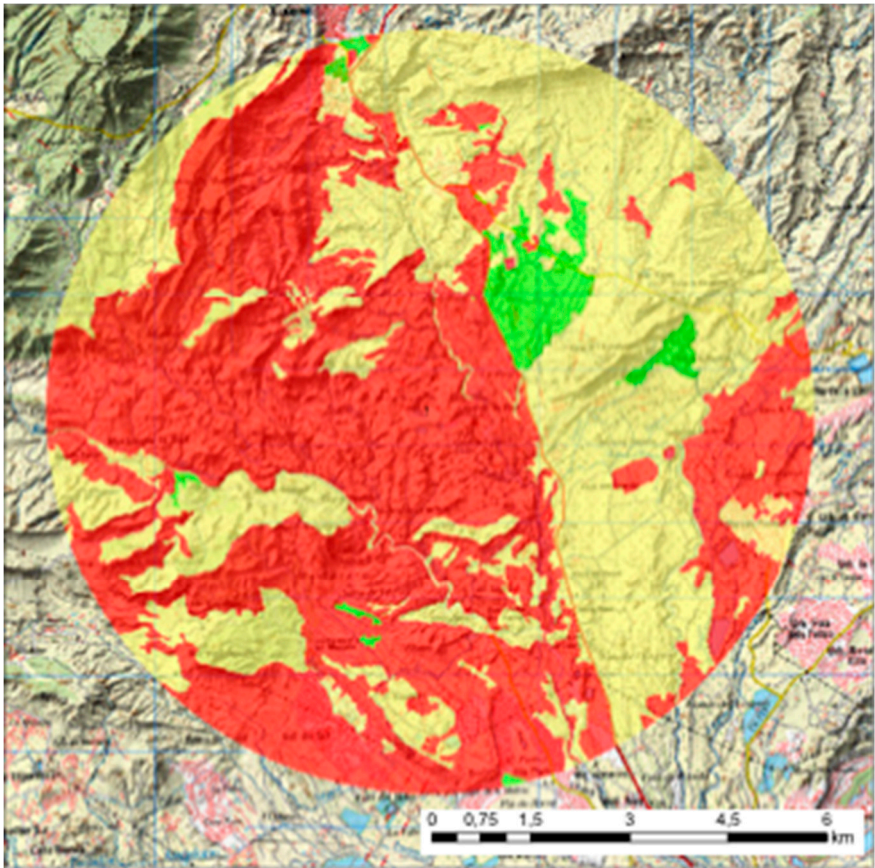

Supplement: s1 [file s1]
